# Supplementary material for: Patient Perspectives on Healthcare in Ehlers-Danlos Syndrome and Hypermobility Spectrum Disorders: An Online Survey
Source: Research Square preprint supplement (doi:10.21203/rs.3.rs-6334393/v1), 2025-09-23
Supplement: Supplementary file 1 [file 22cebcc84c361d11b77aa668.docx]

# Appendix

## Appendix 1: STROBE checklist

## Appendix 2: Original Survey in Swedish

## Appendix 3: Selected Questions Translated to English

## Appendix 4: Additional Analyses

**Appendix 4.** Additional analyses

### **Socio-demographic characteristics and health status**

Most respondents resided in Stockholm Region (18.18%), followed by Western Götaland (12.36%), and Scania (10.18%), see **Figure 1**.


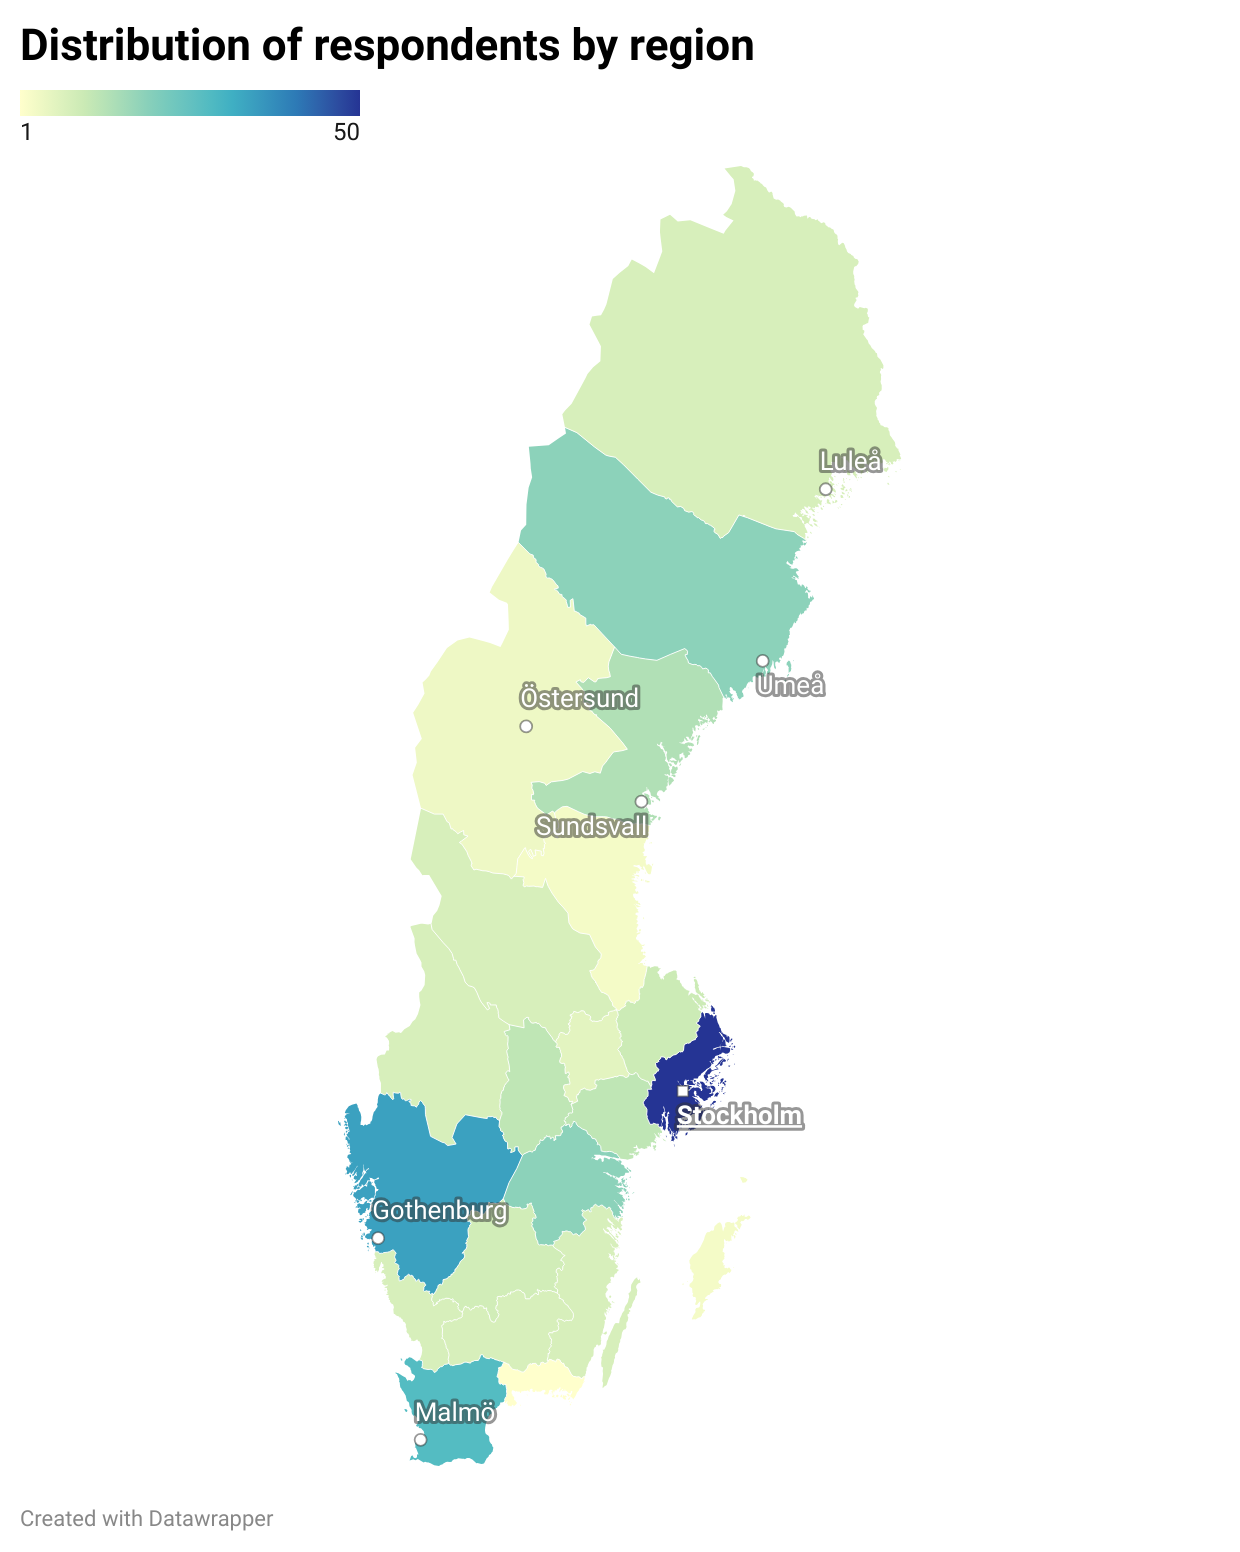


**Figure 1**. Distribution of Respondents by Region.

### **Diagnostic Journey**

### **Genetic Testing**

**Table 1**. Genetic testing in care settings.

|  | Count | % |
| --- | --- | --- |
| **Out of those who received testing, who informed about genetic testing**, (*n* = 41) * |  |  |
| MD in primary care | 3 | 7.32 |
| MD in other specialty care | 14 | 34.15 |
| MD in genetics care | 16 | 39.02 |
| RN in primary care | 0 | 0 |
| RN in specialty care | 2 | 4.88 |
| RN in genetics care | 2 | 4.88 |
| No one | 4 | 9.76 |
| Don’t know | 2 | 4.88 |
| *Prefer not to specify* | 3 | 7.32 |
| **Out of those who received testing, who interpreted the results** * |  |  |
| MD in primary care | 2 | 4.88 |
| MD in other specialty care | 14 | 34.15 |
| MD in genetics care | 17 | 41.46 |
| RN in primary care | 0 | 0 |
| RN in specialty care | 1 | 2.44 |
| RN in genetics care | 1 | 2.44 |
| No one | 9 | 21.95 |
| Other | 4 | 9.76 |

*** Multiple-choice question, so percentages will not add up to 100%.

###

### **Healthcare Utilization and Experience**

### **General Care**

#### **
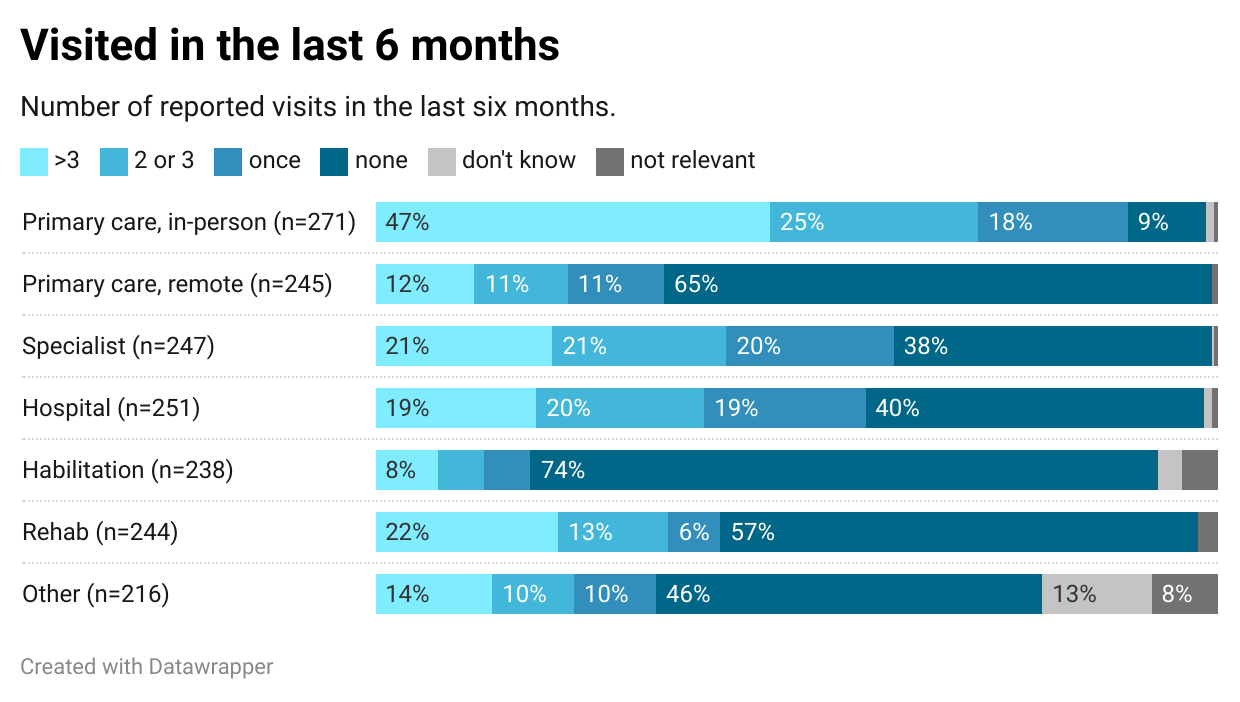
**

**Figure 2.** Care in the last 6 months.

### **Care Needs**


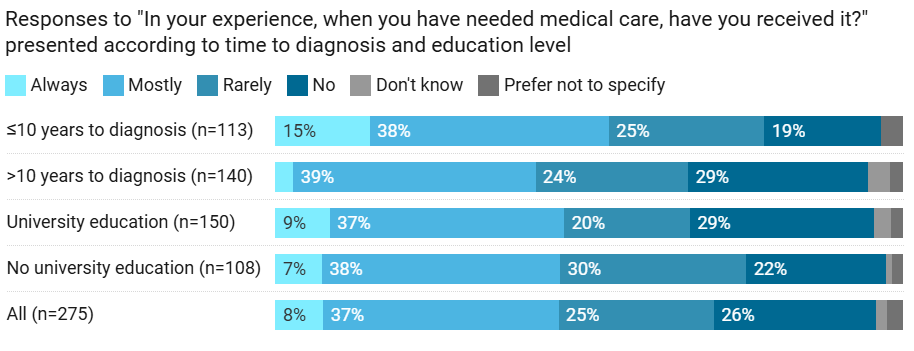


**Figure 3**. Distribution of responses on whether care needs were met based on diagnosis duration and university education.

### **Perceptions and Trust for Healthcare**

#### **Trust for Healthcare**


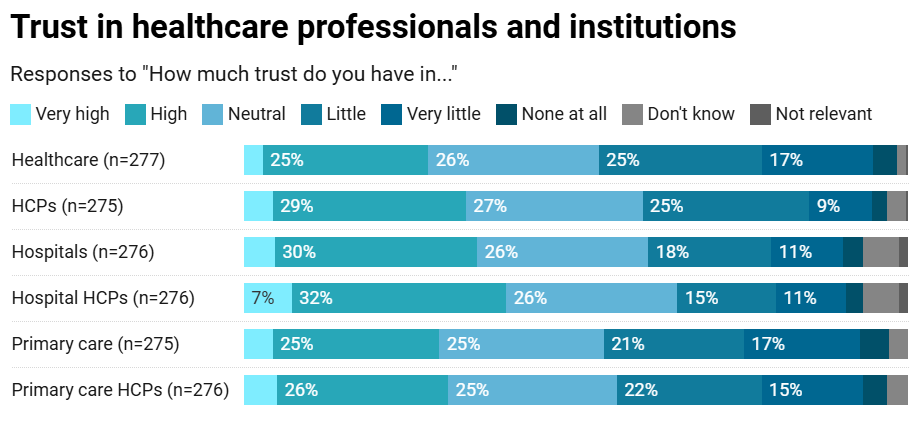


**Figure 4**. Patients’ trust in healthcare professionals.

### **EDS Outside of Healthcare**

#### **Public Services**


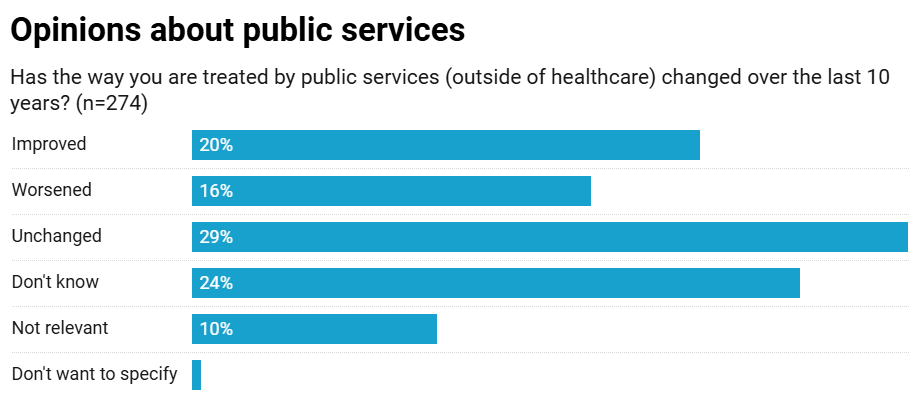


**Figure 5.** Opinions about Public Services and EDS.

####

#### **Work and School**


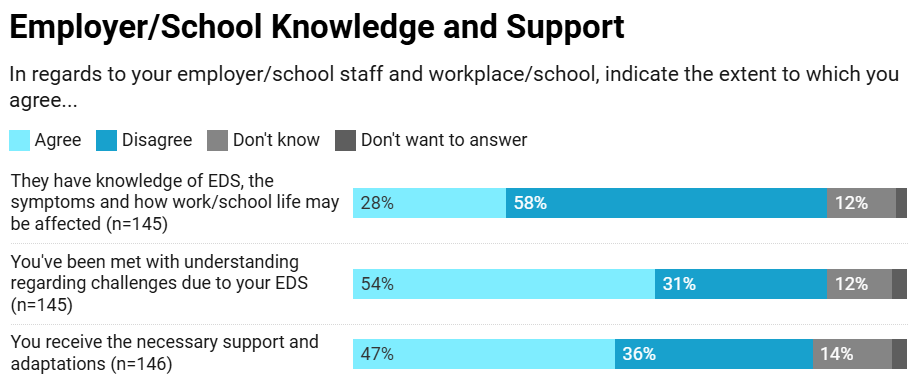


**Figure 6.** Opinions about Employer/School Knowledge and Support
