# Supplementary material for: Patient Perspectives on Healthcare in Ehlers-Danlos Syndrome and Hypermobility Spectrum Disorders: An Online Survey
Source: Research Square preprint supplement (doi:10.21203/rs.3.rs-6334393/v1), 2025-09-23
Supplement: Supplementary file 2 [file 33678dba7ab77652329a04b1.docx]

Rare Diseases Sweden – member survey fall 2021

(translated from Swedish to English, only the questions analyzed in this study are presented)

Rare Diseases Sweden strives for national coordination of care for rare health conditions. Thank you for taking the time to respond to this survey, as it is of great benefit in our advocacy work.

This year, the following actors have also contributed questions to our survey: CSD Center for Rare Diagnoses at Karolinska Institutet, Lif pharmaceuticals, the Swedish Agency for Health Technology and Assessment of Social Services (SBU), the Dental and Pharmaceutical benefits agency (TLV), and Sweden’s three specialized dental care centers of rare conditions, Ågrenska, and Vårdanalys.

The answers are collected completely anonymously and no one will be able to see who answered what. The results are analyzed at group level by us at the National Association together with the research company Stoswe and will be communicated to our partners.

This comprehensive survey will take approximately 30 to 60 minutes to complete, depending on how many free text responses you choose to fill in. You can enter up to 360 characters in free text responses. You do not have to answer all the questions at once, but you can stop answering, save your answers and continue at a later time.

If you are under 16 years old and are filling out the survey, you need to do it together with an adult.

If you have any questions or concerns, please contact us at [info@sallsyntadiagnoser.se](mailto:info@sallsyntadiagnoser.se).

**How to fill out the survey:**

Answer the questions by checking one or more of the options. Several questions are free text so you can comment with your own text.

When you finished a page, click "Next" at the bottom right to move on to the next page. You can go back in the survey by clicking "Previous" at the bottom left. You can also continue answering the survey at a later time by clicking "Save and continue later" at the bottom left and then following the instructions.

When you have completed the entire survey, finish by pressing "**Send**" at the bottom right of the page.

Questions:

1. Are you living with a rare health condition yourself, or are you an informal caregiver/relative to one or more people living with rare health conditions? If you are both, you need to decide below whether you want to complete the survey for yourself or one of your relatives. It is important that you answer all the questions in the entire survey from the same starting point, as one and the same person.

- I am a relative of/informal caregiver to one or more people living with a rare health condition
- I live with a rare health condition myself
- I live with a rare health condition myself **and** as a relative/informal caregiver to one or more people and I am completing the questionnaire **for myself**
- I live with a rare health condition myself **and** as a relative/informal caregiver to one or more people and I am completing the questionnaire for **one of my relatives**
- Do not want to specify

10. How old are you/your loved one with a rare health condition?

- 6 years or younger
- 7-11 years
- 12-18 years
- 19-24 years
- 25-34 years
- 35-44 years
- 45-54 years
- 55-64 years
- 65-74 years
- 75 years or older
- Prefer not to specify age

11. What is your/your relative's highest level of education?

- Currently in pre-/primary school
- Primary school
- Special education, Primary school
- Secondary education/High school
- Special education, Secondary/High school
- Higher education/University/College
- Other
- Prefer not to specify

12. In which country were you/your relative living with a rare health condition born?

- Sweden
- Northern Europe (not Sweden)
- Europe (not Northern)
- Global (not Europe)

13. In which region do you/your relative live?

- Landstinget Sörmland
- Region Blekinge
- Region Dalarna
- Region Gotland
- Region Gävleborg
- Region Halland
- Region Jämtland Härjedalen
- Region Jönköping
- Region Kalmar län
- Region Kronoberg
- Region Norrbotten
- Region Skåne
- Region Stockholm
- Region Uppsala
- Region Värmland
- Region Västerbotten
- Region Västernorrland
- Region Västmanland
- Region Örebro län
- Region Östergötland
- Västra Götalandsregionen
- Outside of Sweden
- Prefer not to specify

14. Do you/your relative with the rare health condition have one or more formal rare disease diagnoses?

- Yes, one or more rare diagnoses are listed in my patient record
- Yes, one or more rare diagnoses but not all are listed in my patient record
- Yes, one or more rare diagnoses but none are listed in my patient record
- No, I am living with a rare health condition but do not have a confirmed diagnosis
- Don't know
- Prefer not to specify

15. What diagnosis or diagnoses do you/your loved one have? Enter below. You can choose several answer options.

[Ehlers-Danlos Syndrom]

16. When was the rare diagnosis established?

- During pregnancy
- At birth
- During childhood
- During adolescence
- As an adult
- Don't know
- Prefer not to specify
- Other, namely___

17. How long did it take to get the rare diagnosis from first contact with healthcare?

- Less than 6 months
- 7-11 months
- 1-2 years
- 3-4 years
- 4-10 years
- More than 10 years
- Don't know
- Prefer not to specify
- Other, namely___

20. How would you rate your/your loved one's health? (1=excellent, 10=poor)*

*note: this scale was inverted in the presentation of the results

23. When you/your loved one has needed a doctor or other medical care, do you feel that you/they have received it?

- Yes, always
- Yes, most of the time
- No, occasionally I have not received medical care or other medical care when needed
- No, it is regular that I do not receive medical care or other medical care when needed
- Don't know
- Do not want to answer the question

25. Have you/your loved one been asked to do genetic testing for the rare health condition?

- Yes
- No
- Don't know
- Prefer not to specify

26. Have you/your loved one undergone genetic testing for the rare health condition?

- Yes
- No
- Don't know
- Prefer not to specify

27. Would you/your loved one have wanted genetic testing for the rare health condition?

- Yes
- No
- Don't know
- Prefer not to specify

28. Did the genetic test result in the diagnosis of one or more rare diseases?

- Yes
- No
- Don't know
- Prefer not to specify

29. Do you/your loved one feel that the treatment and handling in healthcare, related to the rare condition, has changed since the diagnosis was made?

- Yes (please give an example)___
- No
- Don't know
- Prefer not to specify

30. Do you feel that you/your loved one received sufficient information before the genetic testing, so-called genetic guidance?

- Yes
- No
- Don't know
- Prefer not to specify

31. From whom did you/your relative receive information/genetic guidance before the genetic testing? You can select several answer options.

- Primary care physician
- Primary care nurse
- Specialist care physician
- Specialist care nurse
- Clinical genetics physician
- Clinical genetics nurse/genetic counselor
- No one has informed me about genetic testing
- Prefer not to specify
- Don't know
- Other

32. Do you feel that you/your loved one received good information/genetic guidance regarding the result after the genetic testing?

- Yes
- No
- Don't know
- Prefer not to specify

33. From whom did you receive information/genetic guidance regarding the results after the genetic testing? You can choose several answer options.

- Primary care physician
- Primary care nurse
- Specialist care physician
- Specialist care nurse
- Clinical genetics physician
- Clinical genetics nurse/genetic counselor
- No one has informed me about genetic testing
- Prefer not to specify
- Don't know
- Other

35. Estimate how much time you/your loved ones spend on average per week on care and administration of the rare health condition (e.g. self-care, contacts with healthcare, authorities, community services, etc.)

- 0-1 hour
- 2-5 hours
- 6-10 hours
- 11-20 hours
- More than 21 hours
- Don't know
- Not relevant
- refer not to specify

37. Do you/your loved one work/study less than 100% due to the rare health condition?

- Yes, clarify if needed___
- No
- Don't know
- Prefer not to specify

38. What employment status do you/your relative have? School includes all stages in primary school, upper secondary school and college/university.

- Preschool
- School
- Other education
- Work
- Other employment
- Unemployed
- Don't know
- Prefer not to specify

39. Do you/your loved one feel that your employer/school staff has knowledge of your rare health condition, the symptoms and how work/school may be affected?

- Yes
- No. What are you missing?___
- Don't know
- Prefer not to specify

40. Have you/your loved one been met with understanding at the workplace/school (or similar) for the challenges you/they have based on your/their diagnosis?

- Yes
- No. What are you missing?___
- Don't know
- Prefer not to specify

41. Have you/your loved one received the support and adaptations at work/school (or similar) that you/they may need?

- Yes
- No. What are you missing?___
- Don't know
- Prefer not to specify

43. Do you feel that the way you are treated by public services (outside of healthcare) has changed over the last ten years?

- Yes, the service has improved (please give examples of
- improvement) ___
- Yes, the service has deteriorated (please give examples of
- deterioration) ___
- No
- Don't know
- Not relevant
- Does not want to state

*The questions below will be about your/your loved one's aging.*

45. Do you/your loved one believe that there is sufficient knowledge about what life with the rare health condition will be like when you/your loved one gets older?

|  | Yes | No | Don’t know | Prefer not to specify | Not relevant |
| --- | --- | --- | --- | --- | --- |
| Amongst yourself/your loved one |  |  |  |  |  |
| Amongst your healthcare contacts |  |  |  |  |  |
| Amongst your social services contacts outside of healthcare |  |  |  |  |  |

46. Do you think there is enough help and support from healthcare and public services for when you/your loved one gets older?

- Yes
- No. What are you missing? ___
- Don't know
- Prefer not to specify

47.

48. What proportion of your/your loved one's care do you think takes place in primary care? That is at a care centre/health centre.

- More than half of care
- Less than half of care
- Mixed
- Don't know, unsure
- Prefer not to say
- Not relevant

49. Indicate how much trust you/your close relative have in:

|  | Very high | Fairly high | Neither | Fairly little | Very little | None at all | Don’t know | Not relevant |
| --- | --- | --- | --- | --- | --- | --- | --- | --- |
| Healthcare |  |  |  |  |  |  |  |  |
| Healthcare professionals |  |  |  |  |  |  |  |  |
| Hospitals |  |  |  |  |  |  |  |  |
| Hospital healthcare professionals |  |  |  |  |  |  |  |  |
| Primary care |  |  |  |  |  |  |  |  |
| Primary care healthcare professionals |  |  |  |  |  |  |  |  |

50. Do you/your loved one feel that the level of knowledge in healthcare is sufficient to provide the right treatment/follow-up for the rare health condition? (Think about the last two years)

- Yes
- No
- Don't know
- Prefer not to specify
- Not relevant

51. Indicate how much you agree with the statement below regarding you/your loved one:

|  | Strongly agree | Somewhat agree | Neither | Somewhat disagree | Strongly disagree | Don’t know | Prefer not to specify | Not relevant |
| --- | --- | --- | --- | --- | --- | --- | --- | --- |
| I/my relative has access to the health-care I/they needs |  |  |  |  |  |  |  |  |
| Have you/your loved one experienced that you/they were denied care because of your/their  rare health condition(s)? (e.g. not admitted to the ER, not received treatment for a sore throat or other common ailment) |  |  |  |  |  |  |  |  |

52. To what extent do you/your loved one experience that:

|  | Very high | High | Small | None | Don’t know, unsure | Prefer not to specify | Not relevant |
| --- | --- | --- | --- | --- | --- | --- | --- |
| Healthcare encourages disease prevention/promotion of good health |  |  |  |  |  |  |  |

53. Have you/your loved one received an individual care plan, where the goals and timetable for treatments are described?

- Yes, written
- Yes, verbal
- No, neither written nor verbal
- Don't know what an individual care plan is
- Don't know
- Prefer not to specify
- Not relevant

54. Do you/your relative have access to habilitation?

- Yes
- No I don't need it
- No, but I think I need it
- Don't know, unsure
- Prefer not to specify
- Not relevant

55. Do you/your loved one lack information about your/your loved one's rare health condition?

- Yes. (Please provide examples of what information you are missing)
- No
- Don't know
- Prefer not to specify
- Not relevant

*The questions below are about your loved one's care meetings.*

*We ask you to answer to what degree you agree with the following statements based on two time perspectives. First, you start from how you generally experience your contacts in healthcare. Then you start from how you experienced care during covid-19.*

56. To what extent do you feel that the following statements are true for you who live with a rare health condition or your loved one in general:

|  | Strongly agree | Agree | Somewhat agree | Not at all | Don’t know | Not relevant |
| --- | --- | --- | --- | --- | --- | --- |
| That it is easy to see healthcare personnel  when you have needed it |  |  |  |  |  |  |
| Coordination of your healthcare contacts is satisfactory |  |  |  |  |  |  |
| You feel involved in the decisions about your care planning and delivery |  |  |  |  |  |  |
| Healthcare supports you in self-care/management |  |  |  |  |  |  |

61. Would you and your family be helped by having a contact person who helps you with coordination and continuity in your contacts within care and other social functions?

- Yes
- No
- Don't know
- Prefer not to specify
- Not relevant

62. Do you/your loved one have one or more permanent care contacts?

- Yes, one
- Yes, multiple
- No, but I need
- No, not needed
- I'm not sure if I have one/any
- I don't know what a permanent healthcare contact is
- Prefer not to specify
- Not relevant

63. Which occupational category does/do your close relative's permanent care contact(s) have? You can choose several answer options:

- Medical doctor in primary care
- Medical doctor in specialty care/hospital
- Medical doctor in primary care
- Nurse in specialty care/hospital
- Psychologist
- Social worker
- Physiotherapist
- Don't know
- Prefer not to specify
- Not relevant
- Other

64. Do you feel that your/your loved one's permanent care contact(s) help you with healthcare contact and coordination of care?

- Yes. Explain how
- No. Why not
- Don't know
- Prefer not to state
- Not relevant

65. Where do you/your loved one think the best information about the rare health condition can be found? You can choose a maximum of three information sources.

- Doctors
- Other healthcare professionals
- Centre for Rare Diseases at the six university hospitals
- Expert teams at the six university hospitals
- The National Board of Health and Welfare's knowledge database for rare health conditions
- Orpha.net, the European database for rare health conditions
- The Swedish Association for Rare Diseases
- Other diagnostic associations, societies or networks
- Social media blogs
- Social media Facebook/groups
- Online (Google)
- Friends and acquaintances
- Other ____
